# Supplementary material for: Live-cell imaging of lipid droplets using solvatochromic coumarin derivatives
Source: Royal Society of Chemistry journal article supplement (doi:10.1039/d0ob01277g), 2020-01-01
Supplement: d0ob01277g1.pdf [file d0ob01277g1.pdf]

## Live-cell Imaging of Lipid Droplets by Solvatochromic Styrylcoumarin Derivatives

Palash Jana<sup>#‡</sup>, Aravintha Siva<sup>†‡</sup>, Virupakshi Soppina<sup>†\*</sup> and Sriram Kanvah<sup>#\*</sup>

<sup>#</sup>Department of Chemistry, Indian Institute of Technology Gandhinagar,  
Palaj, Gandhinagar 382355, India.

e-mail: [sriram@iitgn.ac.in](mailto:sriram@iitgn.ac.in), [kanvah@gatech.edu](mailto:kanvah@gatech.edu)

<sup>†</sup>Department of Biological Engineering, Indian Institute of Technology Gandhinagar

Palaj Gandhinagar 382355

e-mail: [vsoppina@iitgn.ac.in](mailto:vsoppina@iitgn.ac.in), [vsoppina@gmail.com](mailto:vsoppina@gmail.com)

‡ Equal Contribution

Table-S1: Some known structures that were used for imaging lipid droplets

|                                                                                     |                                                                       |                                                                          |             |                                                              |
|-------------------------------------------------------------------------------------|-----------------------------------------------------------------------|--------------------------------------------------------------------------|-------------|--------------------------------------------------------------|
| 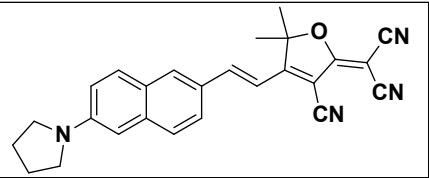  | 3 steps + synthesis of starting materials.                            | $\lambda_{\text{abs}}$ 599 nm,<br>$\lambda_{\text{em}}$ 789 nm<br>(DMSO) | 5 $\mu$ M   | Dyes Pigments<br>171 (2019)<br>107718                        |
|  | 1 step,                                                               | $\lambda_{\text{abs}}$ .403nm,<br>$\lambda_{\text{em}}$ 520nm            | 2 $\mu$ M   | Anal. Chem.<br>2019, 91,<br>1928–1935                        |
|  | 2 steps;<br>Coupling<br>Reaction                                      | $\lambda_{\text{abs}}$ . 405nm,<br>$\lambda_{\text{em}}$ . 520nm         | 10 $\mu$ M  | <b>J. Mater. Chem.<br/>B</b> , 2014, <b>2</b> ,<br>2013-2019 |
|  | 3 steps; Heck<br>Couling and<br>synthesis of<br>starting<br>materials | $\lambda_{\text{abs}}$ . 380nm,<br>$\lambda_{\text{em}}$ 620nm           | 5 $\mu$ M   | <b>Chem. Sci.</b> ,<br>2017, <b>8</b> , 5440-<br>5446        |
|  | 5 steps with<br>Heck reaction                                         | $\lambda_{\text{abs}}$ . 383 nm,<br>$\lambda_{\text{em}}$ 470 nm.        | 100 $\mu$ M | Chem. Asian J.<br>2017, 12, 2501<br>– 2509                   |

|                                                                                     |                                                            |                                                               |             |                                                      |
|-------------------------------------------------------------------------------------|------------------------------------------------------------|---------------------------------------------------------------|-------------|------------------------------------------------------|
| 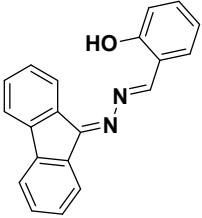   | 2 steps                                                    | $\lambda_{\text{abs}}$ 380nm,<br>$\lambda_{\text{em}}$ 595nm  | 7.5 $\mu$ M | ACS Appl. Mater. Interfaces 2016, 8, 16, 10193-10200 |
|    | 3 steps ,                                                  | $\lambda_{\text{abs}}$ 450nm,<br>$\lambda_{\text{em}}$ 705nm  | 10 $\mu$ M  | <b>Chem. Commun.</b> , 2016, <b>52</b> , 5957-5960   |
|    | 4 steps,<br>65% yield                                      | $\lambda_{\text{abs}}$ 384nm,<br>$\lambda_{\text{em}}$ 578nm  | 12 $\mu$ M  | J. Org. Chem. 2019, 84, 5535–5547                    |
|   | 4 steps and synthesis of starting materials–<br>8.5% yield | $\lambda_{\text{abs}}$ 405, $\lambda_{\text{em}}$ 540nm       | 2 $\mu$ M   | Analyst, 2019, 144, 1608–1621                        |
|  | 3 steps                                                    | $\lambda_{\text{abs}}$ 395 nm,<br>$\lambda_{\text{em}}$ 560nm | 0.5 $\mu$ M | Chem. Sci., 2019, 10, 9009–9016                      |
|  | 3 steps<br>85% yield                                       | $\lambda_{\text{abs}}$ 485nm,<br>$\lambda_{\text{em}}$ 580nm  | 0.2 $\mu$ M | <b>This work</b>                                     |
|  | 3 step 90% yield                                           | $\lambda_{\text{abs}}$ 512nm,<br>$\lambda_{\text{em}}$ 605nm  | 0.2 $\mu$ M | <b>This work</b>                                     |

## Highlights

1. Easy synthetic steps with high yields
2. Coumarin and pyridine functionality provides greater biocompatibility

3. Nanomolar concentration of probes used for live cell lipid droplet imaging
4. High photostability with red emission

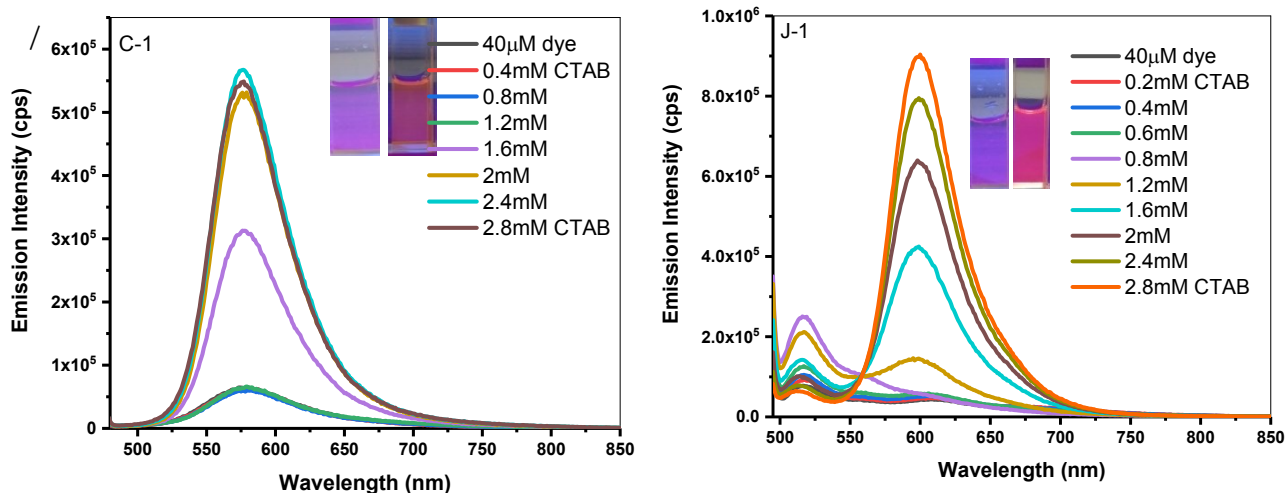

Fig S1: Effect of surfactant (CTAB) concentration on the emission of C-1 and J-1. With increase in concentration, notable emission intensity shifts were noted along with distinct color changes indicating localization preferences.

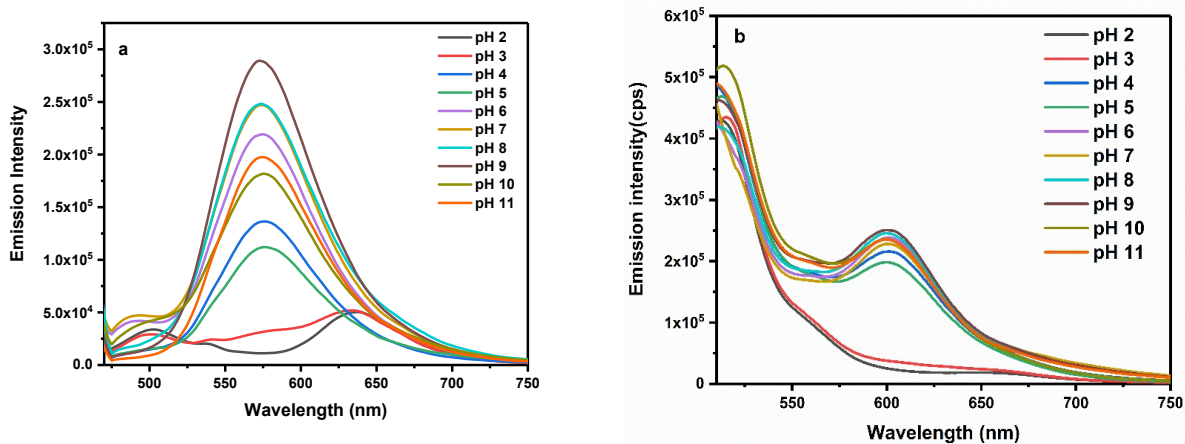

Fig S2: Effect of pH on the emission of C-1 and J-1 (C-1 Ex.wl 450 nm and J-1 Ex Wl 510 nm)

## Supporting Information

### **3-(7-Diethylamino-2-oxo-2*H*-chromen-3-yl)-2-pyridin-4-yl-acrylonitrile (C-1)**

Yield 85 %, (110 mg) <sup>1</sup>H-NMR (500 MHz, CDCl<sub>3</sub>) δ (ppm): 8.81 (s, 1H), 8.66–8.65 (d, 2H), 8.09 (s, 1H), 7.56–7.55 (d, 2H), 7.44–7.42 (d, 1H), 6.66–6.64 (d, 1H), 6.50 (s, 1H), 3.50–3.45 (q, 4H), 1.27–1.24 (t, 6H). <sup>13</sup>C-NMR (125 MHz, DMSO-*d*<sub>6</sub>): δ (ppm) 160.69, 157.59, 153.36, 148.30, 143.71, 132.27, 120.81, 117.33, 112, 111, 108.37, 97.13, 55.38, 45.04, 31.16, 22.65, 12.88 HRMS (ESI-Q-TOF): C<sub>21</sub>H<sub>23</sub>N<sub>2</sub>O<sub>2</sub> [M + H]<sup>+</sup>: cal. *m/z* 346.1585, found, *m/z* 346.1593 (error 2.3ppm)

### **3-(10-Oxo-2,3,5,6-tetrahydro-1*H*,4*H*,10*H*-11-oxa-3*a*-aza-benzo[*de*]anthracen-9-yl)-2-pyridin-4-yl-acrylonitrile (J-1)**

Yield 90%. <sup>1</sup>H-NMR (500 MHz, CDCl<sub>3</sub>) δ (ppm): 8.81 (s, 1H), 8.67–8.66 (d, 2H), 8.2 (s, 1H), 7.68–7.67 (d, 2H), 7.68–7.67 (d, 2H), 7.0 (s, 1H), 3.43–3.40 (t, 4H), 2.94–2.92 (m, 2H), 2.83–2.80 (m, 2H), 2.04–2.02 (t, 4H) <sup>13</sup>C-NMR (125 MHz, CDCl<sub>3</sub>): δ (ppm) 161.92, 152.24, 150.14, 148.54, 142.17, 138.53, 127.40, 119.78, 119.61, 117.76, 111.23, 108.54, 106.31, 104.90, 96.14, 50.42, 27.38, 21.16, 20.19, 19.99. HRMS (ESI-Q-TOF): C<sub>21</sub>H<sub>23</sub>N<sub>2</sub>O<sub>2</sub> [M+ H]<sup>+</sup>: cal. *m/z* 370.1598, found, *m/z* 370.1601 (error 0.8pm)

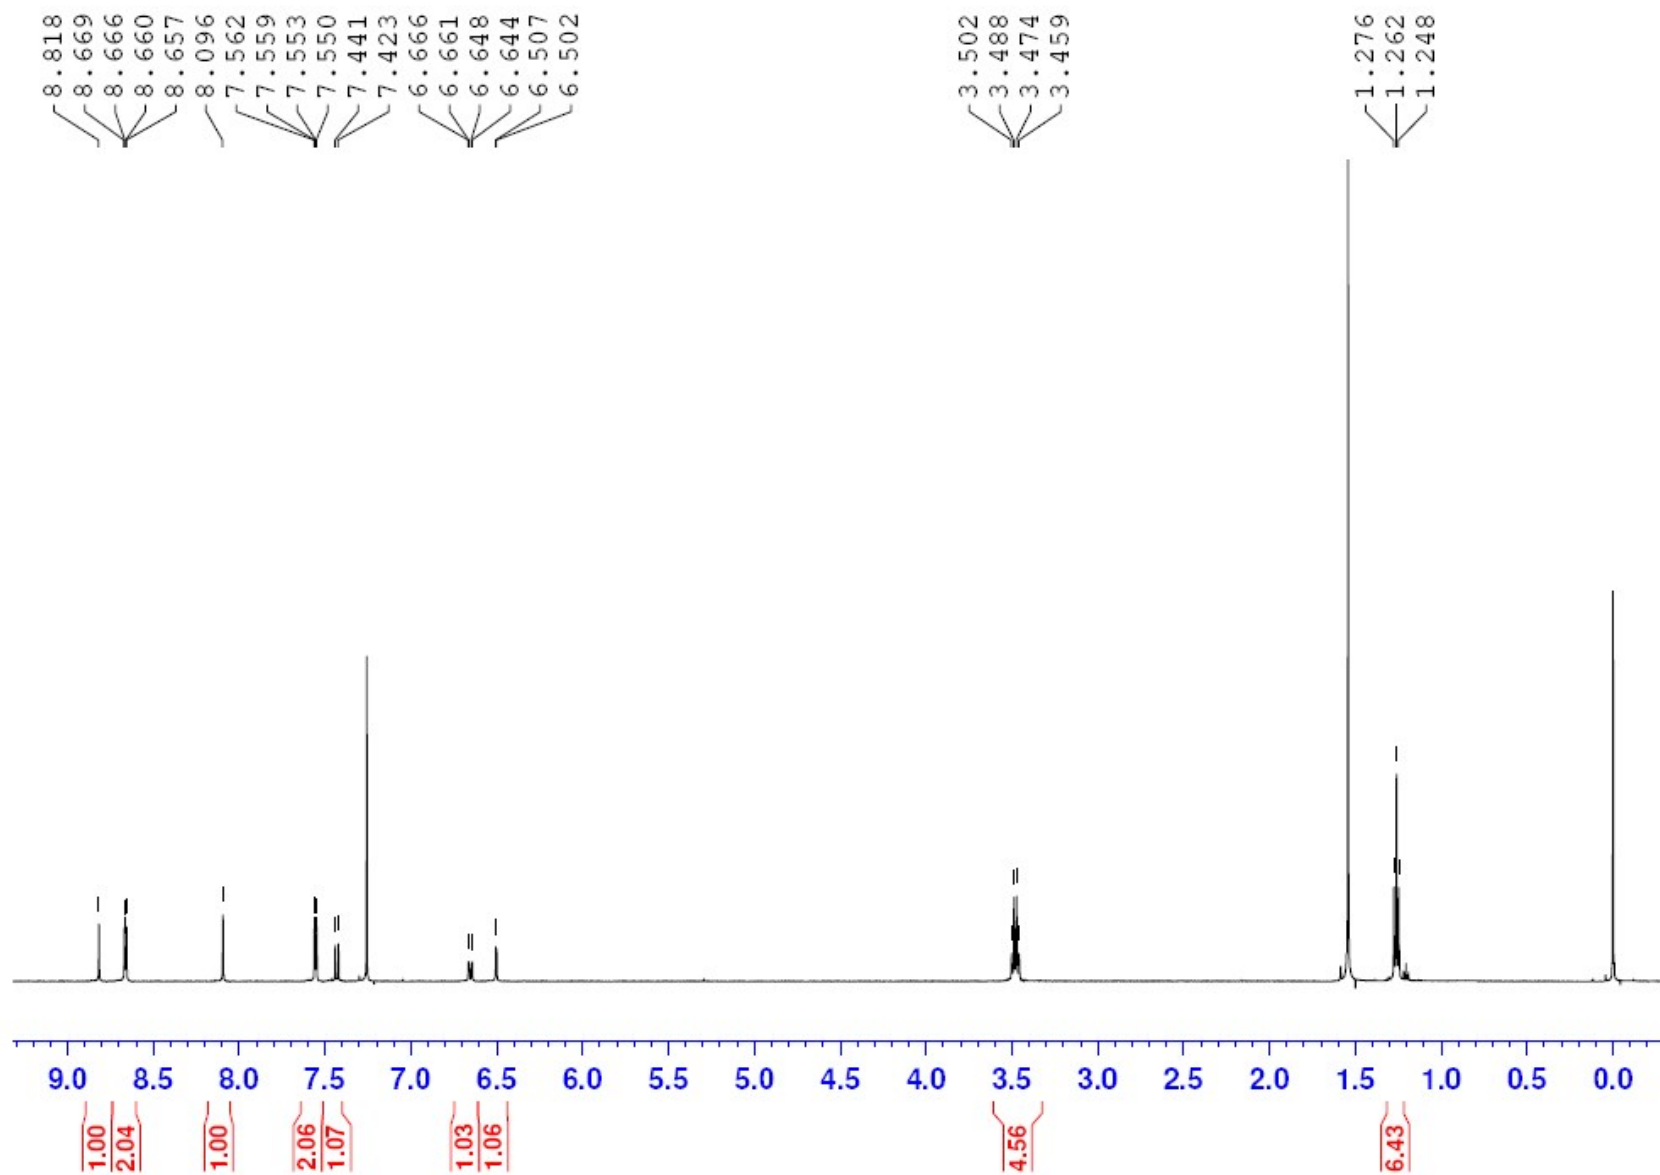

<sup>1</sup>H-NMR spectrum of compound C-1

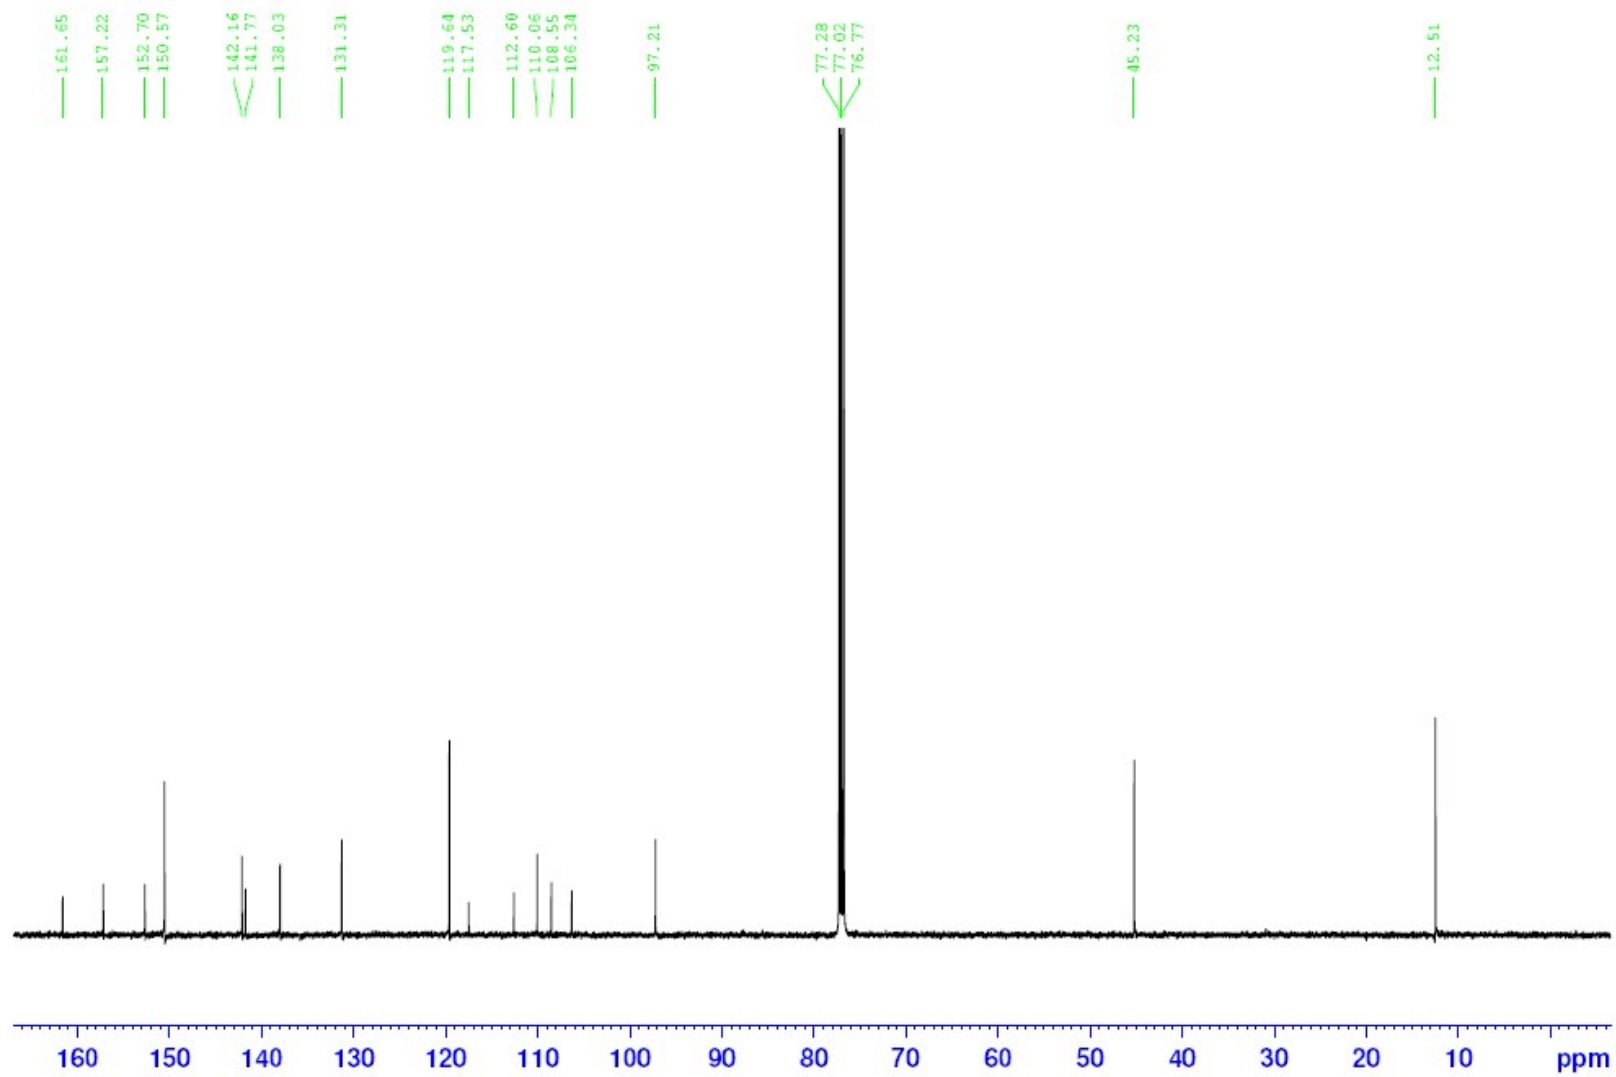

$^{13}\text{C}$ -NMR spectrum of compound C-1

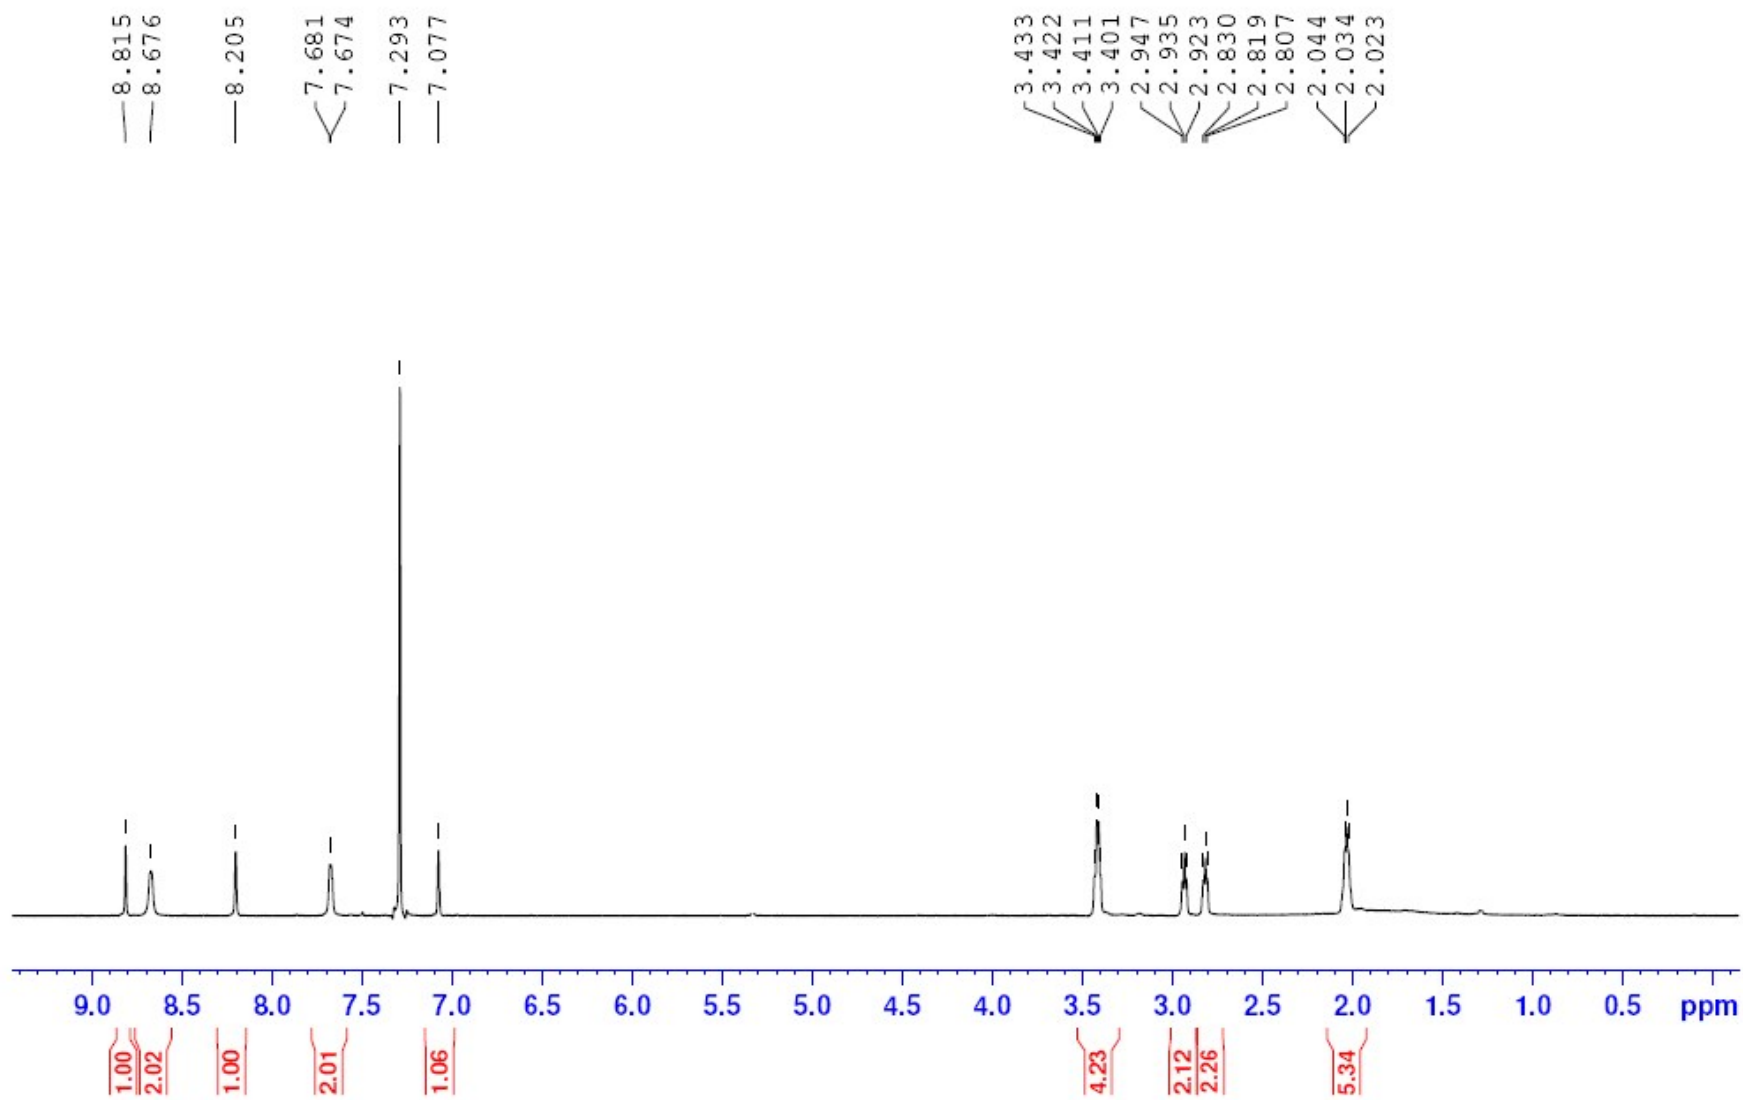

<sup>1</sup>H-NMR spectrum of compound J-1

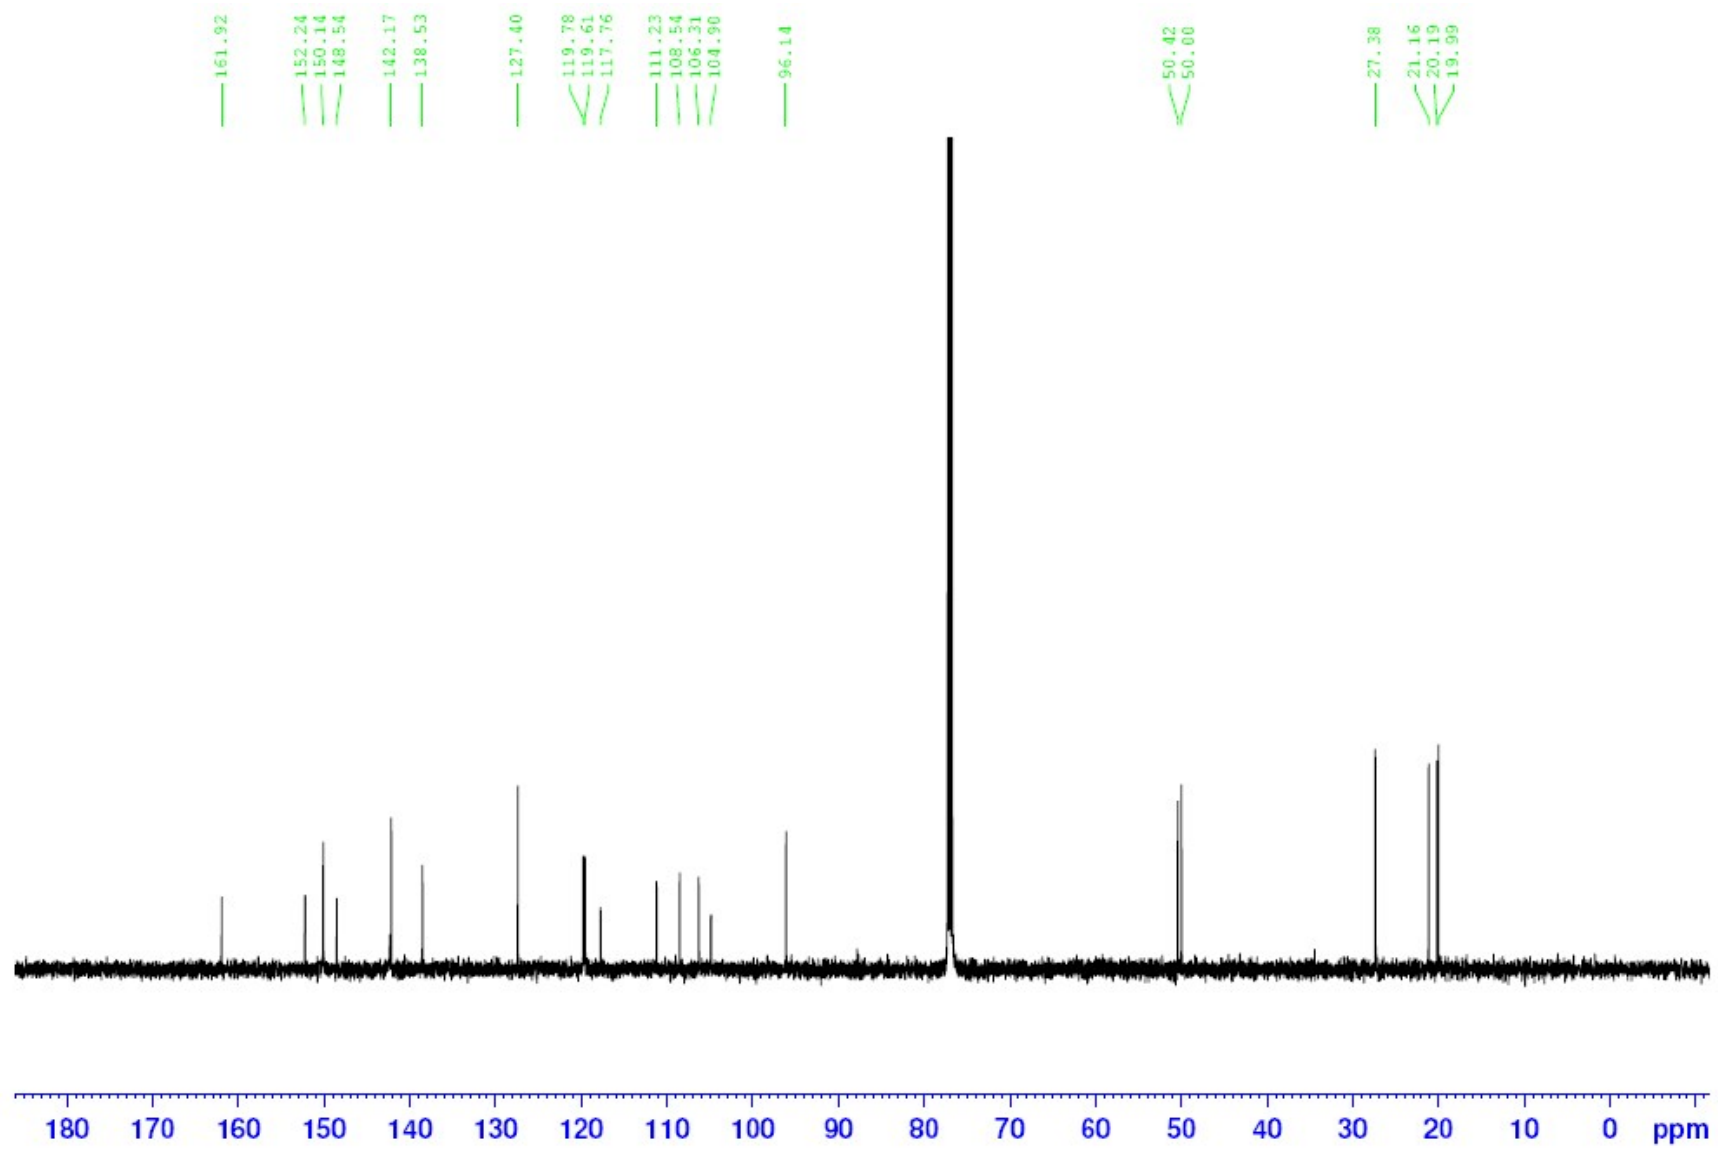

$^{13}\text{C}$ -NMR spectrum of compound J-1



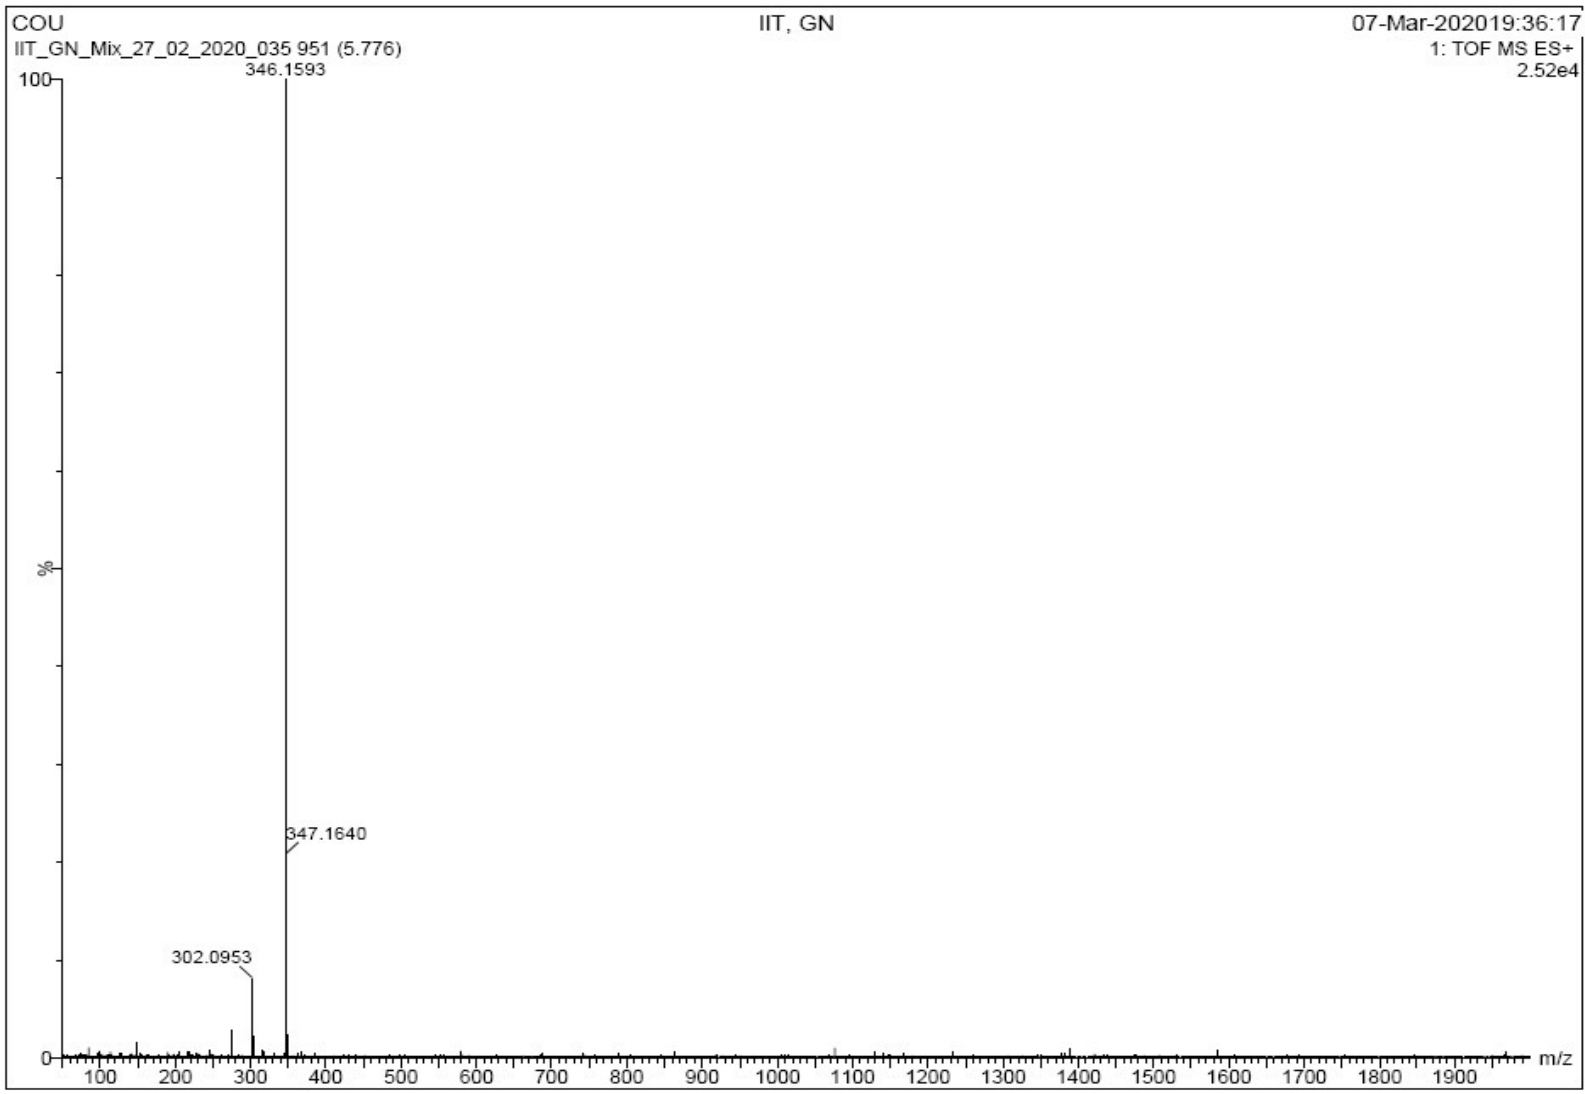

HRMS spectrum of compound C-1

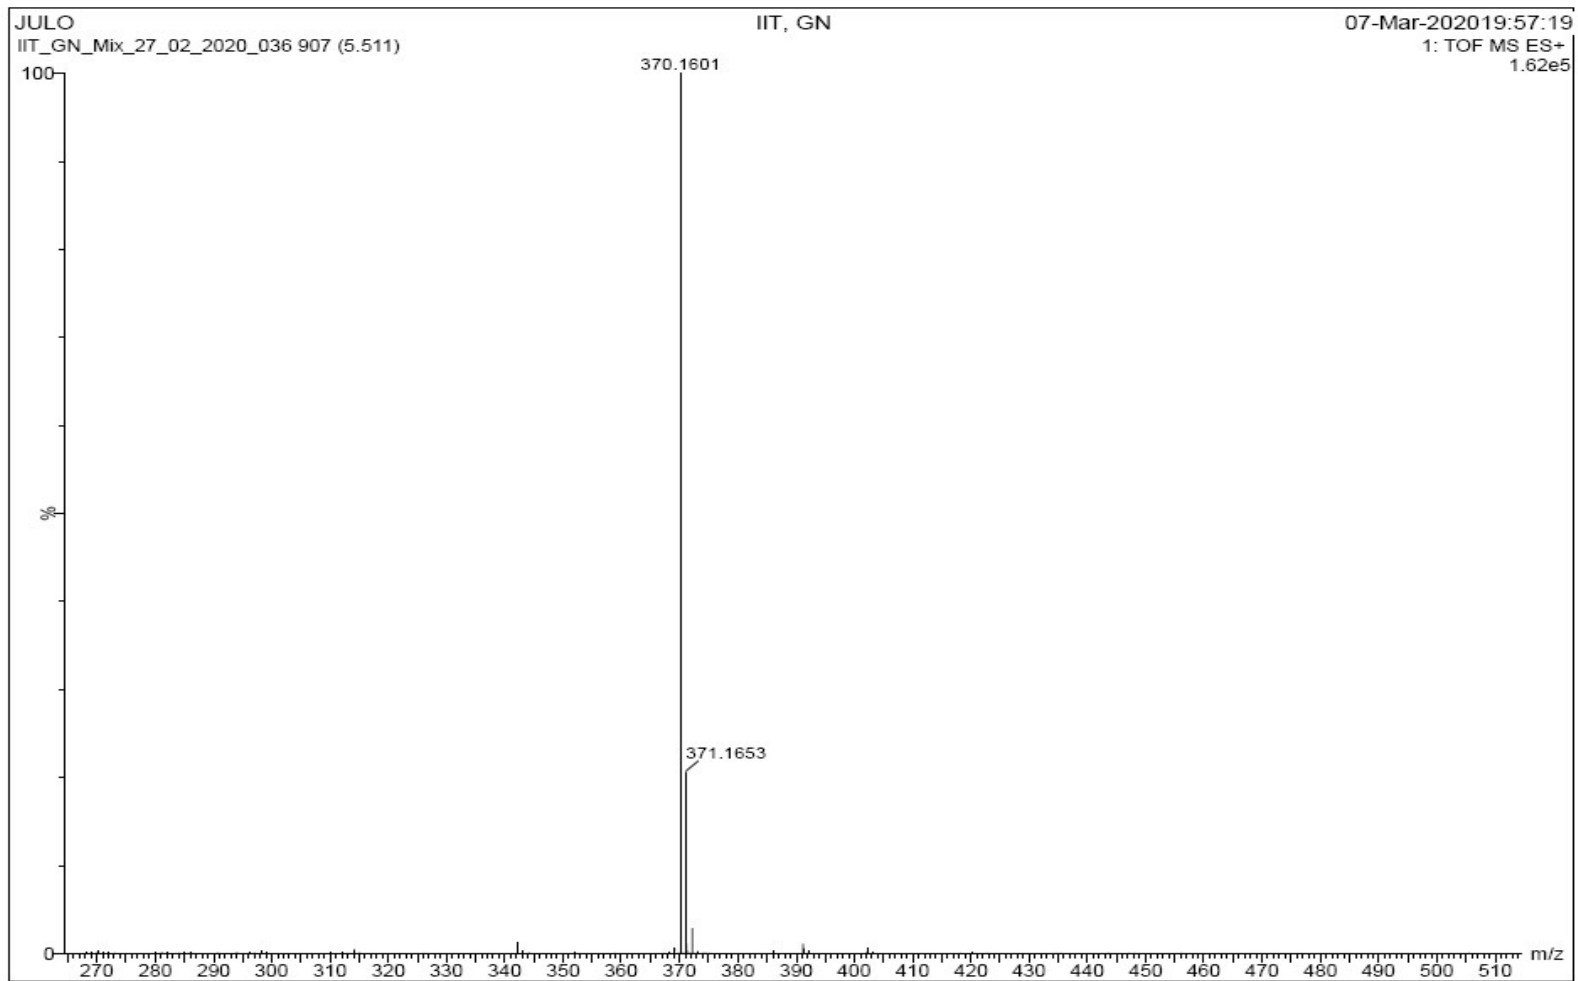

HRMS spectrum of compound J-1
